# Supplementary material for: MOFs for CO2capture and separation from flue gas mixtures: the effect of multifunctional sites on their adsorption capacity and selectivity
Source: Royal Society of Chemistry journal article supplement (doi:10.1039/c2cc35561b), 2012-10-25
Supplement: c2cc35561b.pdf [file c2cc35561b.pdf]

# MOFs for CO<sub>2</sub> Capture and Separation from Flue Gas Mixtures: The Effect of Multifunctional Sites on Their Adsorption Capacity and Selectivity

Zhijuan Zhang,<sup>a,b</sup> Yonggang Zhao,<sup>a</sup> Qihan Gong,<sup>a</sup> Zhong Li,<sup>b</sup> Jing Li<sup>\*a</sup>

<sup>a</sup>Department of Chemistry and Chemical Biology, Rutgers, The State University of New Jersey, Piscataway, New Jersey, 08854, USA

<sup>b</sup>Department of Chemistry and Chemical Engineering, South China University of Technology, Guangzhou, 510641, China

\* Correspondence should be directed to: [jingli@rutgers.edu](mailto:jingli@rutgers.edu)

## Supporting Information

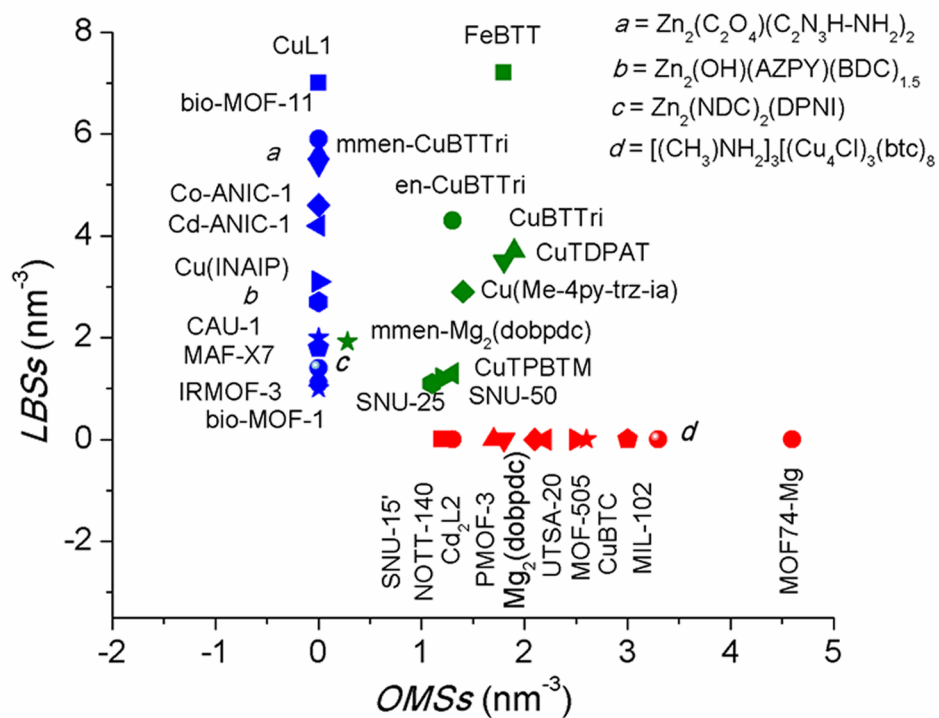

**Fig. S1.** The OMS and LBS density map. Detailed data are listed in Tables 1-4 in the paper. (L1 = 5-(1H-tetrazol-1-yl)isophthalic acid; L2 = 4,4'-(hexafluoroisopropylidene)diphthalate.) (Red points: MOFs with only OMSs; blue points: MOFs with only LBSs; Olive points: MOFs with both OMSs and LBSs).

**Table S1.** Relationship of density of OMSs or LBSs/OFSs with the CO<sub>2</sub> uptake and CO<sub>2</sub>/N<sub>2</sub> selectivity

| Compounds                                   | OMSs<br>(nm <sup>-3</sup> ) | LBSs/OFSs<br>(nm <sup>-3</sup> ) | Qst of CO <sub>2</sub><br>(kJ/mol) | Selectivity<br>CO <sub>2</sub> :N <sub>2</sub> =15:85 | CO <sub>2</sub> uptake (wt%)<br>(0.15 atm) | Ref          |
|---------------------------------------------|-----------------------------|----------------------------------|------------------------------------|-------------------------------------------------------|--------------------------------------------|--------------|
| m <sup>m</sup> en-CuBTTri                   | 0                           | 5.6                              | 96                                 | 327                                                   | 10.5                                       | 1-2          |
| en-CuBTTri                                  | 1.3                         | 4.3                              | 90                                 | 143                                                   | 2.3                                        | 3            |
| CuBTTri                                     | 1.9                         | 3.7                              | 21                                 | 17                                                    | 3.0                                        | 3            |
| FeBTT                                       | 1.8                         | 7.2                              |                                    | 61                                                    | 5.3                                        | 4            |
| MOF-74-Mg                                   | 4.6                         | 0                                | 47                                 | 150                                                   | 27.0                                       | 2, 5         |
| Cu-TDPAT                                    | 1.8                         | 3.5                              | 42.4                               | 88                                                    | 7.5                                        | 6            |
| Cu-TPBTM                                    | 1.3                         | 1.3                              | 26.3                               | 21                                                    | 4.2                                        | 7            |
| PCN-61                                      | 1.2                         | 0                                | 22                                 | 15                                                    | 2.5                                        | 7            |
| Bio-MOF-11                                  | 0                           | 1.0                              | 45                                 | 36                                                    | 5.3                                        | 8-9          |
| Zn <sub>2</sub> (bdc-OH) <sub>2</sub> (ted) | 0                           | 3.14                             | 24.2                               | 4                                                     | 2.4                                        | 10           |
| CuBTC                                       | 2.6                         | 0                                | 30                                 | 21                                                    | 3.8                                        | This<br>work |
| Cu(bpy-1) <sub>2</sub> (SiF <sub>6</sub> )  | 0                           | 4.02                             | 27                                 | 26                                                    | 3.58                                       | 11           |
| Cu(bpy-2) <sub>2</sub> (SiF <sub>6</sub> )  | 0                           | 1.41                             | 21                                 | 23                                                    | 2.26                                       | 11           |

#### References:

- 1 T. M. McDonald, D. M. D'Alessandro, R. Krishna and J. R. Long, *Chem. Sci.*, **2011**, *2*, 2022-2028.
- 2 R. Krishna and J. M. van Baten, *Sep. Purif. Tech.*, **2012**, *87*, 120-126.
- 3 A. Demessence, D. M. D'Alessandro, M. L. Foo and J. R. Long, *J. Am. Chem. Soc.*, **2009**, *131*, 8784-8786.
- 4 K. Sumida, S. Horike, S. S. Kaye, Z. R. Herm, W. L. Queen, C. M. Brown, F. Grandjean, G. J. Long, A. Dailly and J. R. Long, *Chem. Sci.*, **2010**, *1*, 184-191.
- 5 J. A. Mason, K. Sumida, Z. R. Herm, R. Krishna and J. R. Long, *Energy. Environ. Sci.*, **2011**, *4*, 3030-3040.
- 6 B. Li, Z. Zhang, Y. Li, K. Yao, Y. Zhu, Z. Deng, F. Yang, X. Zhou, G. Li, H. Wu, N. Nijem, Y. J. Chabal, Z. Lai, Y. Han, Z. Shi, S. Feng and J. Li, *Angew. Chem. Int. Ed.*, **2012**, *51*, 1412-1415.
- 7 B. Zheng, J. Bai, J. Duan, L. Wojtas and M. J. Zaworotko, *J. Am. Chem. Soc.*, **2010**, *133*, 748-751.
- 8 J. An, S. J. Geib and N. L. Rosi, *J. Am. Chem. Soc.*, **2009**, *131*, 8376-8377.
- 9 Y. Chen and J. Jiang, *ChemSusChem*, **2010**, *3*, 982-988.
- 10 Y. Zhao, H. Wu, T. J. Emge, Q. Gong, N. Nijem, Y. J. Chabal, L. Kong, D. C. Langreth, H. Liu, H. Zeng and J. Li, *Chem. Eur. J.*, **2011**, *17*, 5101-5109.
- 11 S. D. Burd, S. Ma, J. A. Perman, B. J. Sikora, R. Q. Snurr, P. K. Thallapally, J. Tian, L. Wojtas and M. J. Zaworotko, *J. Am. Chem. Soc.*, **2012**, *134*, 3663-3666.
